# Supplementary material for: Association between genetic polymorphisms and osteonecrosis in steroid treatment populations: a detailed stratified and dose-response meta-analysis
Source: PubMed Central journal article supplement (PMC6522878; doi:10.1042/bsr20190024), 2019-05-14
Supplement: BSR-2019-0024_suppS1.pdf [file BSR-2019-0024_suppS1.pdf]

ABCB1 rs1045642 TT genotype

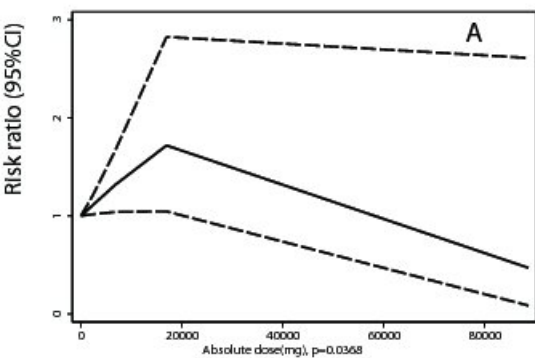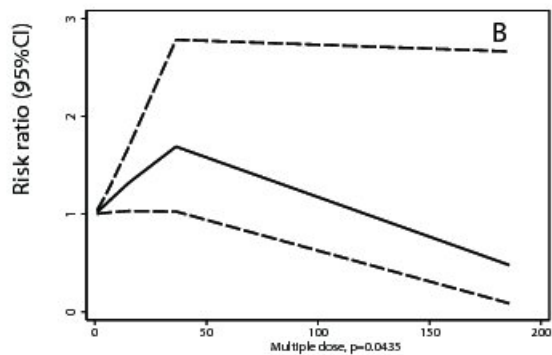

ABCB1 rs1045642 CT genotype

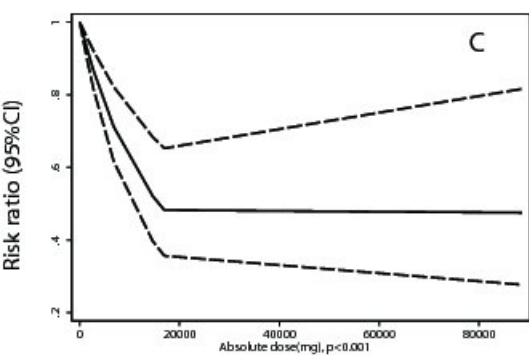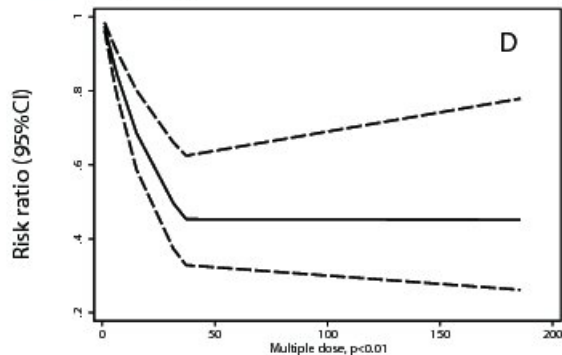

ABCB1 rs2032582 AA/AT/TT genotype

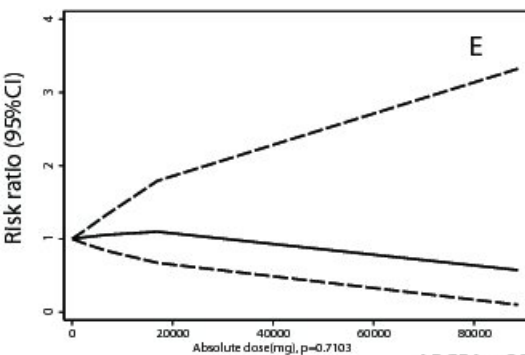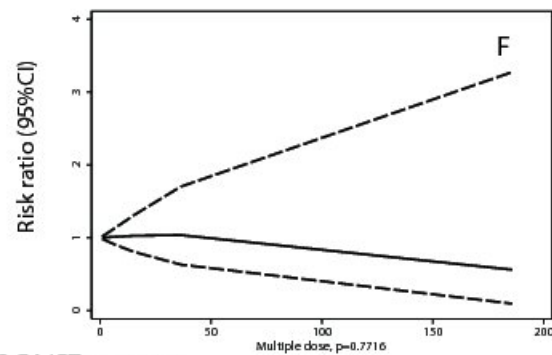

ABCB1 rs2032582 GA/GT genotype

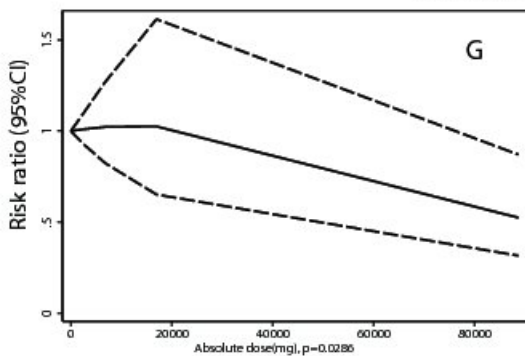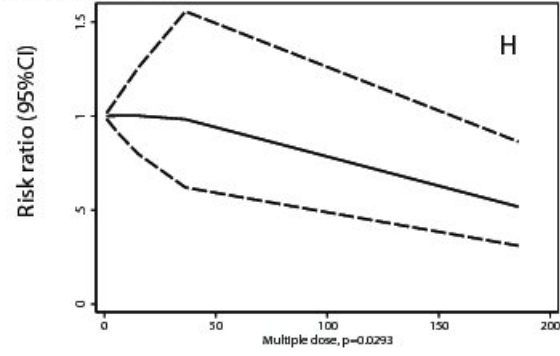

Supplementary table 1. Search queries in each database.

PubMed:

| Search | Query                                                                                                              | Items found | Time    |
|--------|--------------------------------------------------------------------------------------------------------------------|-------------|---------|
| #5     | Search (((#1) AND #2) AND #3) AND #4                                                                               | 108         | 4:38:46 |
| #4     | Search (polymorphism or polymorphisms or SNP or genetic or mutation or genotype or allele or allelic or variation) | 2522483     | 4:38:13 |
| #3     | Search (femoral OR femur OR femoris OR whirlbone)                                                                  | 192476      | 4:38:06 |
| #2     | Search (Osteonecrosis OR necrosis)                                                                                 | 363077      | 4:37:57 |
| #1     | Search (hormone OR glucocorticoid OR steroid OR corticosteroid)                                                    | 1865321     | 4:37:47 |

EmBase:

| Search | Query                                                              | Items found |
|--------|--------------------------------------------------------------------|-------------|
| #25    | #21 AND #22 AND #23 AND #24                                        | 202         |
| #24    | #11 OR #12 OR #13 OR #14 OR #15 OR #16 OR #17 OR #18 OR #19 OR #20 | 2,983,625   |
| #23    | #7 OR #8 OR #9 OR #10                                              | 259,727     |
| #22    | #5 OR #6                                                           | 593,833     |
| #21    | #1 OR #2 OR #3 OR #4                                               | 1,286,683   |
| #20    | variation                                                          | 589,499     |
| #19    | allelic                                                            | 50,116      |
| #18    | allele                                                             | 257,725     |
| #17    | genotype                                                           | 399,242     |
| #16    | mutation                                                           | 838,980     |
| #15    | genetic                                                            | 1,812,465   |
| #14    | snps                                                               | 71,321      |
| #13    | snp                                                                | 75,330      |
| #12    | polymorphisms                                                      | 165,377     |
| #11    | polymorphism                                                       | 404,079     |
| #10    | whirlbone                                                          | 4           |
| #9     | femoris                                                            | 22,759      |
| #8     | femur                                                              | 105,777     |
| #7     | femoral                                                            | 185,332     |
| #6     | necrosis                                                           | 589,024     |
| #5     | osteonecrosis                                                      | 13,356      |
| #4     | 'corticosteroid'                                                   | 274,435     |
| #3     | 'steroid'                                                          | 316,874     |
| #2     | glucocorticoid                                                     | 112,839     |
| #1     | 'hormone'/exp OR hormone                                           | 735,482     |

Cochrane Library:

| Search | Query | Items found |
|--------|-------|-------------|
|--------|-------|-------------|

|    |                                                                                                                        |       |
|----|------------------------------------------------------------------------------------------------------------------------|-------|
| #1 | hormone OR glucocorticoid OR steroid OR corticosteroid                                                                 | 53248 |
| #2 | Osteonecrosis OR necrosis                                                                                              | 13895 |
| #3 | femoral OR femur OR femoris OR whirlbone<br>polymorphism or polymorphisms or SNP or genetic or mutation or genotype or | 12510 |
| #4 | allele or allelic or variation                                                                                         | 48102 |
| #5 | #1 and #2 and #3 and #4                                                                                                | 42    |

Chinese search strategy:

(激素性骨坏死 OR 激素性股骨头坏死) and (基因多态性 or 多态性 or 多态性)

China National Knowledge Infrastructure (CNKI): 47 items

the China Biology Medicine Database: 17 items

the China Science Periodical Database (CSPD, Wanfang Database): 282 items

the VIP Journal Integration Platform (VJIP): 23 items

Supplementary table 2. NOS score details for each included study.

| Author                       | NOS score | Selection                        |                                |                                 |                                 | Comparability                                                              | Exposure                  |                                                     |                   |
|------------------------------|-----------|----------------------------------|--------------------------------|---------------------------------|---------------------------------|----------------------------------------------------------------------------|---------------------------|-----------------------------------------------------|-------------------|
|                              |           | Is the case definition adequate? | Representativeness of the case | Selection of controls           | Definition of controls          | Comparability of cases and controls on the basis of the design or analysis | Ascertainment of exposure | Same method of ascertainment for cases and controls | Non-response rate |
| Zhanqin Zhao 2017[16]        | 9         | Yes                              | Yes                            | Yes                             | Yes                             | Yes                                                                        | Yes                       | Yes                                                 | Yes               |
| Maria Plesa 2017[17]         | 9         | Yes                              | Yes                            | Yes                             | Yes                             | Yes                                                                        | Yes                       | Yes                                                 | Yes               |
| Seth E.Karol 2015[18]        | 7         | Yes                              | Yes                            | No description or inappropriate | Yes                             | Steroid-related confounding factors were not controlled                    | Yes                       | Yes                                                 | Yes               |
| Xiangdong Wei 2015[19]       | 8         | No description or inappropriate  | Yes                            | Yes                             | Yes                             | Yes                                                                        | Yes                       | Yes                                                 | Yes               |
| Yanqiong Zhang 2014[20]      | 7         | No description or inappropriate  | Yes                            | No description or inappropriate | Yes                             | Yes                                                                        | Yes                       | Yes                                                 | Yes               |
| Yun Xue 2014[21]             | 9         | Yes                              | Yes                            | Yes                             | Yes                             | Yes                                                                        | Yes                       | Yes                                                 | Yes               |
| Yong Cui 2014[22]            | 7         | Yes                              | Yes                            | No description or inappropriate | Yes                             | Steroid-related confounding factors were not controlled                    | Yes                       | Yes                                                 | Yes               |
| Ping Zeng 2014[23]           | 8         | No description or inappropriate  | Yes                            | Yes                             | Yes                             | Yes                                                                        | Yes                       | Yes                                                 | Yes               |
| Yanqiong Zhang 2013[24]      | 7         | No description or inappropriate  | Yes                            | No description or inappropriate | Yes                             | Yes                                                                        | Yes                       | Yes                                                 | Yes               |
| Zhiyao Wang 2013[25]         | 6         | No description or inappropriate  | Yes                            | No description or inappropriate | Yes                             | Yes                                                                        | Yes                       | Yes                                                 | Rate different    |
| Yong Li 2012[26]             | 6         | No description or inappropriate  | Yes                            | No description or inappropriate | Yes                             | Steroid-related confounding factors were not controlled                    | Yes                       | Yes                                                 | Yes               |
| Weibiao Fang 2011[27]        | 8         | Yes                              | Yes                            | Yes                             | No description or inappropriate | Yes                                                                        | Yes                       | Yes                                                 | Yes               |
| Weibiao Fang 2011[28]        | 8         | Yes                              | Yes                            | No description or inappropriate | Yes                             | Yes                                                                        | Yes                       | Yes                                                 | Yes               |
| Jonathan Bond 2011[29]       | 8         | No description or inappropriate  | Yes                            | Yes                             | Yes                             | Yes                                                                        | Yes                       | Yes                                                 | Yes               |
| Wei He 2009[30]              | 7         | Yes                              | Yes                            | Yes                             | No description or inappropriate | Steroid-related confounding factors were not controlled                    | Yes                       | Yes                                                 | Yes               |
| Wei He 2009[31]              | 7         | Yes                              | Yes                            | No description or inappropriate | Yes                             | Steroid-related confounding factors were not controlled                    | Yes                       | Yes                                                 | Yes               |
| Masaaki Kuribayashi 2008[32] | 9         | Yes                              | Yes                            | Yes                             | Yes                             | Yes                                                                        | Yes                       | Yes                                                 | Yes               |
| Deborah French 2008[33]      | 7         | Yes                              | Yes                            | No description or inappropriate | No description or inappropriate | Yes                                                                        | Yes                       | Yes                                                 | Yes               |
| Shixin Wang 2008[34]         | 8         | Yes                              | Yes                            | No description or inappropriate | Yes                             | Yes                                                                        | Yes                       | Yes                                                 | Yes               |
| Kyoko Tamura 2007[35]        | 9         | Yes                              | Yes                            | Yes                             | Yes                             | Yes                                                                        | Yes                       | Yes                                                 | Yes               |
| X.Y Yang 2007[36]            | 9         | Yes                              | Yes                            | Yes                             | Yes                             | Yes                                                                        | Yes                       | Yes                                                 | Yes               |
| Tetsuro Hirata 2007[37]      | 7         | No description or inappropriate  | Yes                            | No description or inappropriate | Yes                             | Yes                                                                        | Yes                       | Yes                                                 | Yes               |
| Tetsuro Hirata 2007[38]      | 7         | No description or inappropriate  | Yes                            | No description or inappropriate | Yes                             | Yes                                                                        | Yes                       | Yes                                                 | Yes               |
| Yakup Ekmekci 2006[39]       | 7         | Yes                              | Yes                            | Yes                             | No description or inappropriate | Steroid-related confounding factors were not controlled                    | Yes                       | Yes                                                 | Yes               |
| A.Celik 2006[40]             | 8         | Yes                              | Yes                            | No description or inappropriate | Yes                             | Yes                                                                        | Yes                       | Yes                                                 | Yes               |
| Mary V.Relling 2004[41]      | 8         | Yes                              | Yes                            | No description or inappropriate | Yes                             | Yes                                                                        | Yes                       | Yes                                                 | Yes               |
| Takeshi Asano 2004[42]       | 8         | Yes                              | Yes                            | No description or inappropriate | Yes                             | Yes                                                                        | Yes                       | Yes                                                 | Yes               |
| Takeshi Asano 2003[43]       | 7         | Yes                              | Yes                            | No description or inappropriate | Yes                             | Steroid-related confounding factors were not controlled                    | Yes                       | Yes                                                 | Yes               |
| Takeshi Asano 2003[44]       | 8         | Yes                              | Yes                            | No description or inappropriate | Yes                             | Yes                                                                        | Yes                       | Yes                                                 | Yes               |
| Paolo Ferrari 2002[45]       | 8         | Yes                              | Yes                            | Yes                             | No description or inappropriate | Yes                                                                        | Yes                       | Yes                                                 | Yes               |

Supplementary Table 3. Details of the included studies for the analysis of each group in the meta-analysis.

| Gene  | Location      | SNP       | Model/Category      | Subgroups        | No. of studies | References                                                                                                                                                                                      |
|-------|---------------|-----------|---------------------|------------------|----------------|-------------------------------------------------------------------------------------------------------------------------------------------------------------------------------------------------|
| ABCB1 | Multinational | rs1045642 | Allelic model       |                  | 8              | Yanqiong Zhang 2014[20];Yun Xue 2014[21];Wei He 2009[30];Masaaki Kuribayashi 2008[32];X.Y Yang 2007[36];Takeshi Asano 2003[44];Yong Li 2012[26];Mary V.Relling 2004[41]                         |
|       |               |           | Heterozygous model  |                  | 8              | Yanqiong Zhang 2014[20];Yun Xue 2014[21];Wei He 2009[30];Masaaki Kuribayashi 2008[32];X.Y Yang 2007[36];Takeshi Asano 2003[44];Yong Li 2012[26];Mary V.Relling 2004[41]                         |
|       |               |           | Homozygous model    |                  | 8              | Yanqiong Zhang 2014[20];Yun Xue 2014[21];Wei He 2009[30];Masaaki Kuribayashi 2008[32];X.Y Yang 2007[36];Takeshi Asano 2003[44];Yong Li 2012[26];Mary V.Relling 2004[41]                         |
|       |               |           | Dominant model      |                  | 9              | Yanqiong Zhang 2014[20];Yun Xue 2014[21];Wei He 2009[30];Masaaki Kuribayashi 2008[32];X.Y Yang 2007[36];Takeshi Asano 2003[44];Yong Li 2012[26];Mary V.Relling 2004[41];Deborah French 2008[33] |
|       |               |           | Recessive model     |                  | 8              | Yanqiong Zhang 2014[20];Yun Xue 2014[21];Wei He 2009[30];Masaaki Kuribayashi 2008[32];X.Y Yang 2007[36];Takeshi Asano 2003[44];Yong Li 2012[26];Mary V.Relling 2004[41]                         |
| ABCB1 | China         | rs1045642 | Allelic model       |                  | 5              | Yanqiong Zhang 2014[20];Yun Xue 2014[21];Wei He 2009[30];X.Y Yang 2007[36];Yong Li 2012[26]                                                                                                     |
|       |               |           | Heterozygous model  |                  | 5              | Yanqiong Zhang 2014[20];Yun Xue 2014[21];Wei He 2009[30];X.Y Yang 2007[36];Yong Li 2012[26]                                                                                                     |
|       |               |           | Homozygous model    |                  | 5              | Yanqiong Zhang 2014[20];Yun Xue 2014[21];Wei He 2009[30];X.Y Yang 2007[36];Yong Li 2012[26]                                                                                                     |
|       |               |           | Dominant model      |                  | 5              | Yanqiong Zhang 2014[20];Yun Xue 2014[21];Wei He 2009[30];X.Y Yang 2007[36];Yong Li 2012[26]                                                                                                     |
|       |               |           | Recessive model     |                  | 5              | Yanqiong Zhang 2014[20];Yun Xue 2014[21];Wei He 2009[30];X.Y Yang 2007[36];Yong Li 2012[26]                                                                                                     |
|       |               | rs1045642 | Continuous variable |                  |                |                                                                                                                                                                                                 |
|       |               |           |                     | TC vs CC         | 8              | Yanqiong Zhang 2014[20];Yun Xue 2014[21];Wei He 2009[30];Masaaki Kuribayashi 2008[32];X.Y Yang 2007[36];Takeshi Asano 2003[44];Yong Li 2012[26];Mary V.Relling 2004[41]                         |
|       |               |           |                     | TT vs CC         | 8              | Yanqiong Zhang 2014[20];Yun Xue 2014[21];Wei He 2009[30];Masaaki Kuribayashi 2008[32];X.Y Yang 2007[36];Takeshi Asano 2003[44];Yong Li 2012[26];Mary V.Relling 2004[41]                         |
|       |               |           |                     | TC/TT vs CC      | 9              | Yanqiong Zhang 2014[20];Yun Xue 2014[21];Wei He 2009[30];Masaaki Kuribayashi 2008[32];X.Y Yang 2007[36];Takeshi Asano 2003[44];Yong Li 2012[26];Mary V.Relling 2004[41];Deborah French 2008[33] |
|       |               |           |                     | Type of steroids |                |                                                                                                                                                                                                 |

|       |               |                 |                               |   |                                                                                                                                            |
|-------|---------------|-----------------|-------------------------------|---|--------------------------------------------------------------------------------------------------------------------------------------------|
|       |               |                 | Prednisolone                  | 1 | Yanqiong Zhang 2014[20]                                                                                                                    |
|       |               |                 | Prednisone                    | 4 | Yun Xue 2014[21];Wei He 2009[30];Yong Li 2012[26];Mary V.Relling 2004[41]                                                                  |
|       |               |                 | Methylprednisolone/Prednisone | 3 | Masaaki Kuribayashi 2008[32];X.Y Yang 2007[36];Takeshi Asano 2003[44]                                                                      |
|       |               |                 | Prednisone/Dexamethasone      | 1 | Deborah French 2008[33]                                                                                                                    |
|       |               | Primary disease |                               |   |                                                                                                                                            |
|       |               |                 | Hemoglobinopathies            | 1 | Wei He 2009[30]                                                                                                                            |
|       |               |                 | Renal transplant              | 2 | Masaaki Kuribayashi 2008[32];Takeshi Asano 2003[44]                                                                                        |
|       |               |                 | Acute lymphoblastic leukemia  | 2 | Mary V.Relling 2004[41];Deborah French 2008[33]                                                                                            |
|       |               |                 | Systemic lupus erythematosus  | 1 | X.Y Yang 2007[36]                                                                                                                          |
| ABCB1 | Multinational | rs2032582       | Allelic model                 | 7 | Yanqiong Zhang 2014[20];Yun Xue 2014[21];Wei He 2009[30];X.Y Yang 2007[36];Takeshi Asano 2003[44];Yong Li 2012[26];Mary V.Relling 2004[41] |
|       |               |                 | Heterozygous model            | 7 | Yanqiong Zhang 2014[20];Yun Xue 2014[21];Wei He 2009[30];X.Y Yang 2007[36];Takeshi Asano 2003[44];Yong Li 2012[26];Mary V.Relling 2004[41] |
|       |               |                 | Homozygous model              | 7 | Yanqiong Zhang 2014[20];Yun Xue 2014[21];Wei He 2009[30];X.Y Yang 2007[36];Takeshi Asano 2003[44];Yong Li 2012[26];Mary V.Relling 2004[41] |
|       |               |                 | Dominant model                | 7 | Yanqiong Zhang 2014[20];Yun Xue 2014[21];Wei He 2009[30];X.Y Yang 2007[36];Takeshi Asano 2003[44];Yong Li 2012[26];Mary V.Relling 2004[41] |
|       |               |                 | Recessive model               | 7 | Yanqiong Zhang 2014[20];Yun Xue 2014[21];Wei He 2009[30];X.Y Yang 2007[36];Takeshi Asano 2003[44];Yong Li 2012[26];Mary V.Relling 2004[41] |
| ABCB1 | China         | rs2032582       | Allelic model                 | 5 | Yanqiong Zhang 2014[20];Yun Xue 2014[21];Wei He 2009[30];X.Y Yang 2007[36];Yong Li 2012[26]                                                |
|       |               |                 | Heterozygous model            | 5 | Yanqiong Zhang 2014[20];Yun Xue 2014[21];Wei He 2009[30];X.Y Yang 2007[36];Yong Li 2012[26]                                                |
|       |               |                 | Homozygous model              | 5 | Yanqiong Zhang 2014[20];Yun Xue 2014[21];Wei He 2009[30];X.Y Yang 2007[36];Yong Li 2012[26]                                                |
|       |               |                 | Dominant model                | 5 | Yanqiong Zhang 2014[20];Yun Xue 2014[21];Wei He 2009[30];X.Y Yang 2007[36];Yong Li 2012[26]                                                |
|       |               |                 | Recessive model               | 5 | Yanqiong Zhang 2014[20];Yun Xue 2014[21];Wei He 2009[30];X.Y Yang 2007[36];Yong Li 2012[26]                                                |
|       |               |                 | Continuous variable           |   |                                                                                                                                            |
|       |               |                 | GA/GT vs GG                   | 7 | Yanqiong Zhang 2014[20];Yun Xue 2014[21];Wei He 2009[30];X.Y Yang 2007[36];Takeshi Asano 2003[44];Yong Li 2012[26];Mary                    |

|      |               |       |                                 |   |                                                                                                                                            |
|------|---------------|-------|---------------------------------|---|--------------------------------------------------------------------------------------------------------------------------------------------|
|      |               |       |                                 |   | V.Relling 2004[41]                                                                                                                         |
|      |               |       | AA/TT/AT vs GG                  | 7 | Yanqiong Zhang 2014[20];Yun Xue 2014[21];Wei He 2009[30];X.Y Yang 2007[36];Takeshi Asano 2003[44];Yong Li 2012[26];Mary V.Relling 2004[41] |
|      |               |       | Other vs GG                     | 7 | Yanqiong Zhang 2014[20];Yun Xue 2014[21];Wei He 2009[30];X.Y Yang 2007[36];Takeshi Asano 2003[44];Yong Li 2012[26];Mary V.Relling 2004[41] |
|      |               |       | Type of steroids                |   |                                                                                                                                            |
|      |               |       | Prednisolone                    | 1 | Yanqiong Zhang 2014[20]                                                                                                                    |
|      |               |       | Prednisone                      | 4 | Yun Xue 2014[21];Wei He 2009[30];Yong Li 2012[26];Mary V.Relling 2004[41]                                                                  |
|      |               |       | Methylprednisolone/Prednisone   | 1 | X.Y Yang 2007[36]                                                                                                                          |
|      |               |       | Methylprednisolone/Prednisolone | 1 | Takeshi Asano 2003[44]                                                                                                                     |
|      |               |       | Primary disease                 |   |                                                                                                                                            |
|      |               |       | Hemoglobinopathies              | 1 | Wei He 2009[30]                                                                                                                            |
|      |               |       | Renal transplant                | 1 | Takeshi Asano 2003[44]                                                                                                                     |
|      |               |       | Acute lymphoblastic leukemia    | 1 | Mary V.Relling 2004[41]                                                                                                                    |
|      |               |       | Systemic lupus erythematosus    | 1 | X.Y Yang 2007[36]                                                                                                                          |
| ApoB | Multinational | rs693 | Allelic model                   | 4 | Weibiao Fang 2011[27];Masaaki Kuribayashi 2008[32];Xiangdong Wei 2015[19];Ping Zeng 2014[23]                                               |
|      |               |       | Heterozygous model              | 4 | Weibiao Fang 2011[27];Masaaki Kuribayashi 2008[32];Xiangdong Wei 2015[19];Ping Zeng 2014[23]                                               |
|      |               |       | Homozygous model                | 4 | Weibiao Fang 2011[27];Masaaki Kuribayashi 2008[32];Xiangdong Wei 2015[19];Ping Zeng 2014[23]                                               |
|      |               |       | Dominant model                  | 5 | Weibiao Fang 2011[27];Masaaki Kuribayashi 2008[32];Xiangdong Wei 2015[19];Ping Zeng 2014[23];Tetsurou Hirata 2007[38]                      |
|      |               |       | Recessive model                 | 4 | Weibiao Fang 2011[27];Masaaki Kuribayashi 2008[32];Xiangdong Wei 2015[19];Ping Zeng 2014[23]                                               |
| ApoB | China         | rs693 | Allelic model                   | 3 | Weibiao Fang 2011[27];Xiangdong Wei 2015[19];Ping Zeng 2014[23]                                                                            |
|      |               |       | Heterozygous model              | 3 | Weibiao Fang 2011[27];Xiangdong Wei 2015[19];Ping Zeng 2014[23]                                                                            |
|      |               |       | Homozygous model                | 3 | Weibiao Fang 2011[27];Xiangdong Wei 2015[19];Ping Zeng 2014[23]                                                                            |
|      |               |       | Dominant model                  | 3 | Weibiao Fang 2011[27];Xiangdong Wei 2015[19];Ping Zeng 2014[23]                                                                            |
|      |               |       | Recessive model                 | 3 | Weibiao Fang 2011[27];Xiangdong Wei 2015[19];Ping Zeng 2014[23]                                                                            |
|      |               |       | Continuous variable             |   |                                                                                                                                            |

|       |               |           |                                 |   |                                                                                                                      |
|-------|---------------|-----------|---------------------------------|---|----------------------------------------------------------------------------------------------------------------------|
|       |               |           | CT vs CC                        | 4 | Weibiao Fang 2011[27];Masaaki Kuribayashi 2008[32];Xiangdong Wei 2015[19];Ping Zeng 2014[23]                         |
|       |               |           | TT vs CC                        | 4 | Weibiao Fang 2011[27];Masaaki Kuribayashi 2008[32];Xiangdong Wei 2015[19];Ping Zeng 2014[23]                         |
|       |               |           | CT/TT vs CC                     | 5 | Weibiao Fang 2011[27];Masaaki Kuribayashi 2008[32];Xiangdong Wei 2015[19];Ping Zeng 2014[23];Tetsuro Hirata 2007[38] |
|       |               |           | Type of steroids                |   |                                                                                                                      |
|       |               |           | Prednisone                      | 3 | Weibiao Fang 2011[27];Xiangdong Wei 2015[19];Ping Zeng 2014[23]                                                      |
|       |               |           | Methylprednisolone/Prednisolone | 2 | Masaaki Kuribayashi 2008[32];Tetsuro Hirata 2007[38]                                                                 |
|       |               |           | Primary disease                 |   |                                                                                                                      |
|       |               |           | Renal transplant                | 2 | Masaaki Kuribayashi 2008[32];Tetsuro Hirata 2007[38]                                                                 |
| ApoB  | Multinational | rs1042031 | Dominant model                  | 4 | Weibiao Fang 2011[27];Tetsuro Hirata 2007[38];Xiangdong Wei 2015[19];Ping Zeng 2014[23]                              |
| ApoB  | China         | rs1042031 | Dominant model                  | 3 | Weibiao Fang 2011[27];Xiangdong Wei 2015[19];Ping Zeng 2014[23]                                                      |
|       |               |           | Continuous variable             |   |                                                                                                                      |
|       |               |           | GA vs GG                        | 4 | Weibiao Fang 2011[27];Tetsuro Hirata 2007[38];Xiangdong Wei 2015[19];Ping Zeng 2014[23]                              |
|       |               |           | Type of steroids                |   |                                                                                                                      |
|       |               |           | Prednisone                      | 3 | Weibiao Fang 2011[27];Xiangdong Wei 2015[19];Ping Zeng 2014[23]                                                      |
|       |               |           | Methylprednisolone/Prednisolone | 1 | Tetsuro Hirata 2007[38]                                                                                              |
|       |               |           | Primary disease                 |   |                                                                                                                      |
|       |               |           | Renal transplant                | 1 | Tetsuro Hirata 2007[38]                                                                                              |
| MTHFR | Multinational | rs1801133 | Allelic model                   | 3 | Mary V.Relling 2004[41];Takeshi Asano 2004[42];A.Celik 2006[40]                                                      |
|       |               |           | Heterozygous model              | 3 | Mary V.Relling 2004[41];Takeshi Asano 2004[42];A.Celik 2006[40]                                                      |
|       |               |           | Homozygous model                | 3 | Mary V.Relling 2004[41];Takeshi Asano 2004[42];A.Celik 2006[40]                                                      |
|       |               |           | Dominant model                  | 4 | Mary V.Relling 2004[41];Takeshi Asano 2004[42];A.Celik 2006[40];Deborah French 2008[33]                              |
|       |               |           | Recessive model                 | 3 | Mary V.Relling 2004[41];Takeshi Asano 2004[42];A.Celik 2006[40]                                                      |
|       |               |           | Continuous variable             |   |                                                                                                                      |
|       |               |           | TC vs CC                        | 3 | Mary V.Relling 2004[41];Takeshi Asano 2004[42];A.Celik 2006[40]                                                      |
|       |               |           | TT vs CC                        | 3 | Mary V.Relling 2004[41];Takeshi Asano 2004[42];A.Celik 2006[40]                                                      |
|       |               |           | TC/TT vs CC                     | 4 | Mary V.Relling 2004[41];Takeshi Asano 2004[42];A.Celik 2006[40];Deborah French 2008[33]                              |



|       |               |           |                                 |   |                                                                |
|-------|---------------|-----------|---------------------------------|---|----------------------------------------------------------------|
|       |               |           | Type of steroids                |   |                                                                |
|       |               |           | Prednisolone                    | 1 | A.Celik 2006[40]                                               |
|       |               |           | Prednisone                      | 1 | Mary V.Relling 2004[41]                                        |
|       |               |           | Methylprednisolone/Prednisolone | 1 | Takeshi Asano 2004[42]                                         |
|       |               |           | Primary disease                 |   |                                                                |
|       |               |           | Acute lymphoblastic leukemia    |   |                                                                |
|       |               |           | Renal transplant                | 2 | Takeshi Asano 2004[42];A.Celik 2006[40]                        |
| PAI-1 | Multinational | rs1799768 | Allelic model                   | 3 | Paolo Ferrari 2002[45];Yong Li 2012[26];Takeshi Asano 2004[42] |
|       |               |           | Heterozygous model              | 3 | Paolo Ferrari 2002[45];Yong Li 2012[26];Takeshi Asano 2004[42] |
|       |               |           | Homozygous model                | 3 | Paolo Ferrari 2002[45];Yong Li 2012[26];Takeshi Asano 2004[42] |
|       |               |           | Dominant model                  | 3 | Paolo Ferrari 2002[45];Yong Li 2012[26];Takeshi Asano 2004[42] |
|       |               |           | Recessive model                 | 3 | Paolo Ferrari 2002[45];Yong Li 2012[26];Takeshi Asano 2004[42] |
|       |               |           | Continuous variable             |   |                                                                |
|       |               |           | 4G5G vs 4G4G                    | 3 | Paolo Ferrari 2002[45];Yong Li 2012[26];Takeshi Asano 2004[42] |
|       |               |           | 5G5G vs 4G4G                    | 3 | Paolo Ferrari 2002[45];Yong Li 2012[26];Takeshi Asano 2004[42] |
|       |               |           | 4G5G/5G5G vs 4G4G               | 3 | Paolo Ferrari 2002[45];Yong Li 2012[26];Takeshi Asano 2004[42] |
|       |               |           | Type of steroids                |   |                                                                |
|       |               |           | Prednisone                      | 2 | Paolo Ferrari 2002[45];Yong Li 2012[26]                        |
|       |               |           | Methylprednisolone/Prednisolone | 1 | Takeshi Asano 2004[42]                                         |
|       |               |           | Primary disease                 |   |                                                                |
|       |               |           | Renal transplant                | 2 | Paolo Ferrari 2002[45];Takeshi Asano 2004[42]                  |
